# Supplementary material
Source: Royal Society of Chemistry journal article supplement (doi:10.1039/d5ta10353c)
Supplement: d5ta10353c1.pdf [file d5ta10353c1.pdf]

## Supplementary Information

### **In situ construction of Cs<sub>3</sub>Sb<sub>2</sub>Br<sub>9</sub>/CeO<sub>2</sub> heterojunction for efficient photooxidation of 5-hydroxymethylfurfural**

*Jing-Wei Feng<sup>†</sup>, Qi Qin<sup>†</sup>, Cheng-Yi Huang, Rui-Shu Hong, Zhi-Hua Xia, Dai-Bing Kuang, and Hong-Yan Chen\**

Key Laboratory of Bioinorganic and Synthetic Chemistry of Ministry of Education, LIFM, GBRCE for Functional Molecular Engineering, School of Chemistry, IGCME, Sun Yat-sen University, Guangzhou 510006, China

E-mail: chenhy33@mail.sysu.edu.cn (H. Y. Chen)

[<sup>†</sup>] These authors contributed equally to this work.

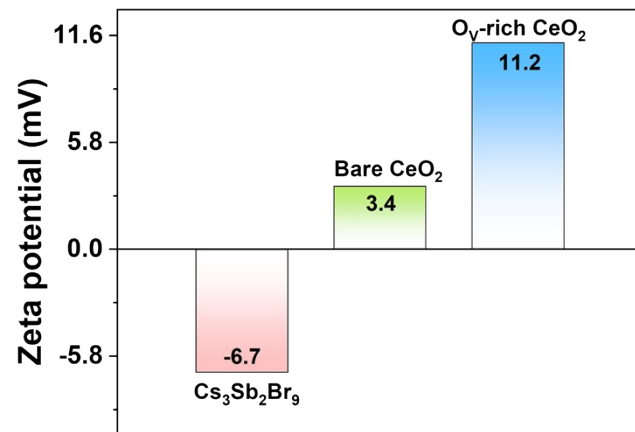

**Fig. S1.** Zeta potential of  $\text{Cs}_3\text{Sb}_2\text{Br}_9$ , Bare  $\text{CeO}_2$  and  $\text{O}_V$ -rich  $\text{CeO}_2$ .

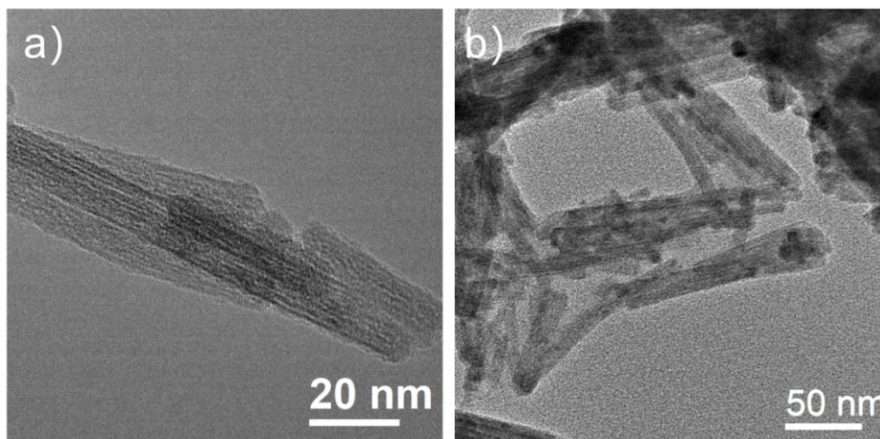

**Fig. S2.** TEM images of  $\text{CeO}_2$  (a) and  $\text{Cs}_3\text{Sb}_2\text{Br}_9/\text{CeO}_2$ -10.

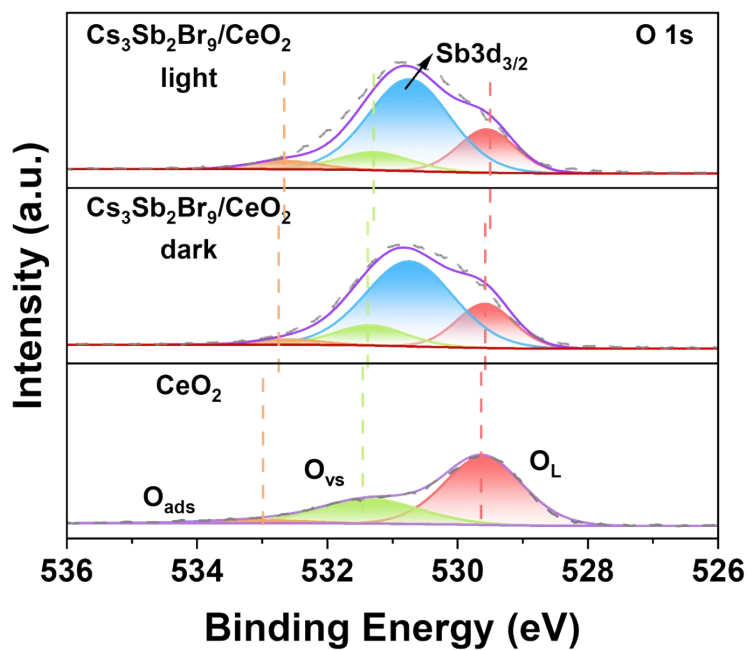

**Fig. S3.** O 1s spectra of  $\text{CeO}_2$  and  $\text{Cs}_3\text{Sb}_2\text{Br}_9/\text{CeO}_2$ -10 heterojunction.

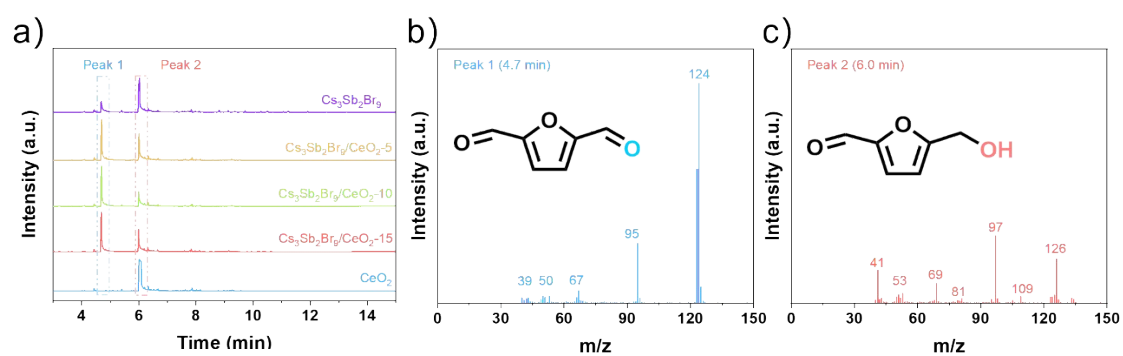

**Fig. S4.** (a) GC spectra and the corresponding MS spectra of DFF (b), HMF (c). Photocatalytic reaction conditions: 5.0 mL EtOAc, 5.0 mg cat, 20 mM HMF, 1 atm  $\text{O}_2$ , AM 1.5G 150  $\text{mW cm}^{-2}$ , 2 h illumination.

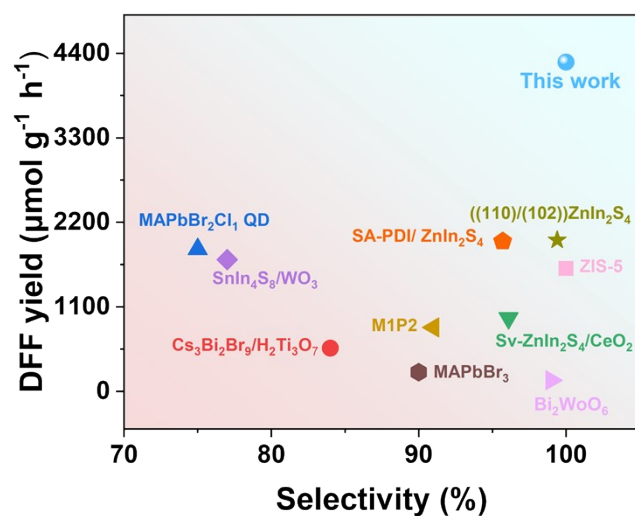

**Fig. S5.** Comparison of photocatalytic activity of Cs<sub>3</sub>Sb<sub>2</sub>Br<sub>9</sub>/CeO<sub>2</sub> (reaction conditions: 5.0 mL EtOAc, 5.0 mg cat, 5 mM HMF, 1 atm O<sub>2</sub>, AM 1.5G 150 mW cm<sup>-2</sup>, 70 min) with literature reports.

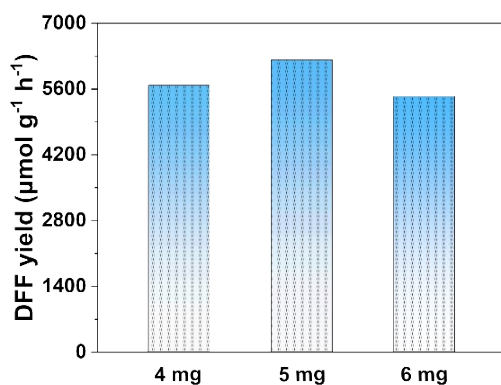

**Fig. S6.** DFF production rates under different catalyst loads (4, 5, 6 mg), identifying 5 mg as the optimal dosage. reaction conditions: 5.0 mL EtOAc, 20 mM HMF, 1 atm O<sub>2</sub>, AM 1.5G 150 mW cm<sup>-2</sup>, 2h.

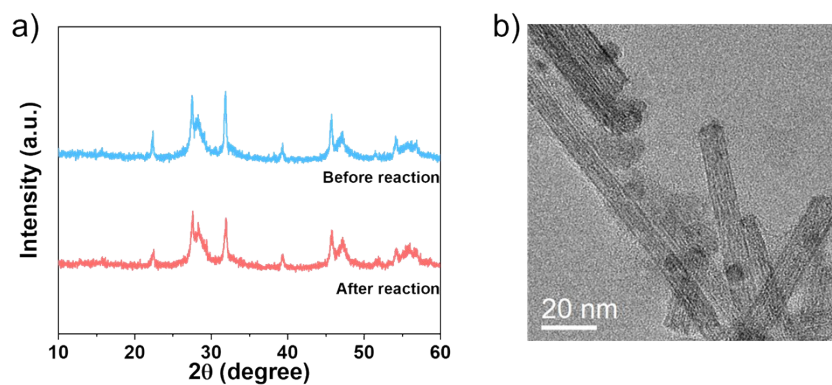

**Fig. S7.** (a) XRD patterns of  $\text{Cs}_3\text{Sb}_2\text{Br}_9/\text{CeO}_2$ -10 before and after photocatalytic reaction. (b) TEM of  $\text{Cs}_3\text{Sb}_2\text{Br}_9/\text{CeO}_2$ -10 after photocatalytic reaction (with  $\text{Na}_2\text{SO}_4$ ).

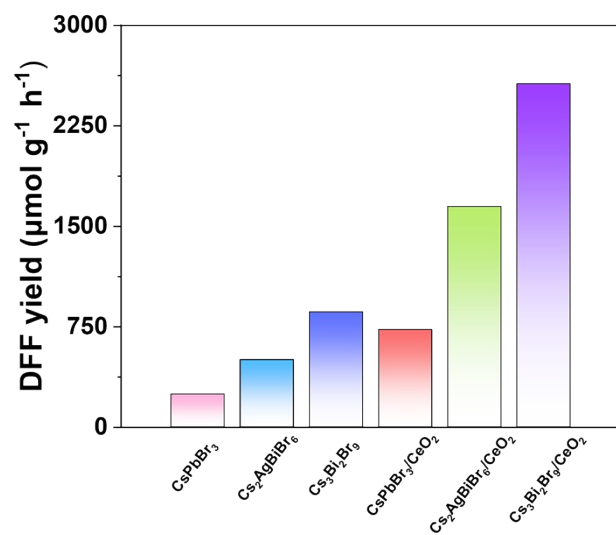

**Fig. S8.** Catalytic performance comparison of different perovskites and heterojunctions for HMF oxidation.

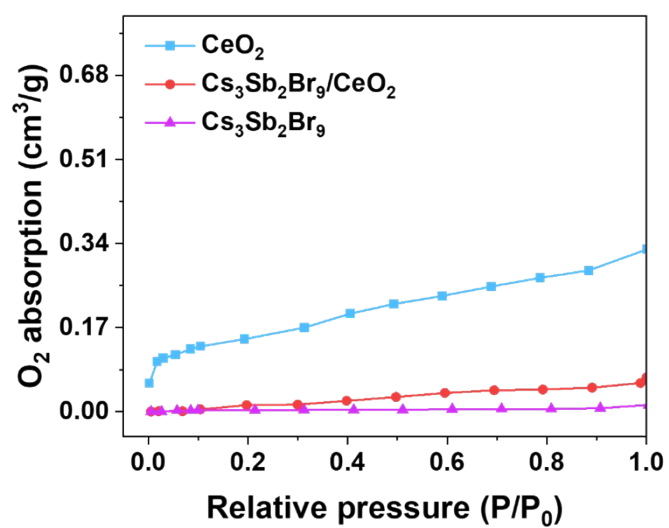

**Fig. S9.** O<sub>2</sub> adsorption curves of CeO<sub>2</sub>, Cs<sub>3</sub>Sb<sub>2</sub>Br<sub>9</sub> and Cs<sub>3</sub>Sb<sub>2</sub>Br<sub>9</sub>/CeO<sub>2</sub>.

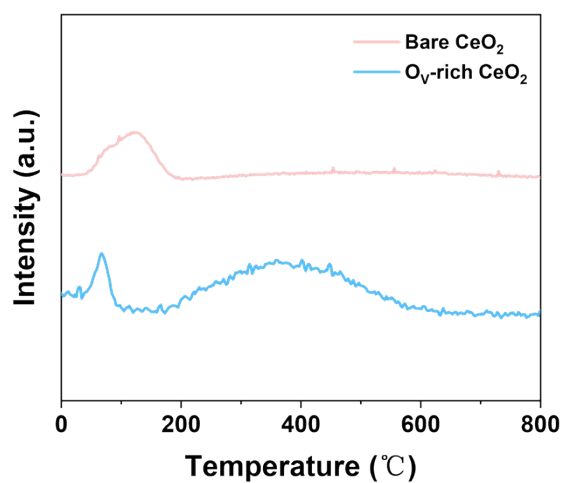

**Fig. S10.** O<sub>2</sub>-TPD curves of Bare CeO<sub>2</sub> and O<sub>V</sub>-rich CeO<sub>2</sub>.

**Table S1.** Comparison of photocatalytic HMF oxidation performances of Cs<sub>3</sub>Sb<sub>2</sub>Br<sub>9</sub>/CeO<sub>2</sub> with previously reported photocatalytic systems (low HMF concentration, ≤ 10 mM ).

| Photocatalyst                                                                                  | Reaction conditions                                                                                        | Time   | HMF conv. (%) | DFF Selec. (%) | DFF Yield (μmol g <sup>-1</sup> h <sup>-1</sup> ) | Ref.      |
|------------------------------------------------------------------------------------------------|------------------------------------------------------------------------------------------------------------|--------|---------------|----------------|---------------------------------------------------|-----------|
| Cs <sub>3</sub> Sb <sub>2</sub> Br <sub>9</sub> /CeO <sub>2</sub>                              | 5 mg catalyst, 5 mM HMF, ethyl acetate (5 mL), AM 1.5 G, 150 mW/cm <sup>2</sup> , O <sub>2</sub>           | 70 min | 100           | 100            | 4285.7                                            | This work |
| ZIS-5                                                                                          | 20 mg catalyst, 8 mM HMF, acetonitrile (5 mL), visible light irradiation (λ ≥ 420 nm), air, 25 °C          | 70 min | 92            | 100            | 1600                                              | 1         |
| Cs <sub>3</sub> Bi <sub>2</sub> Br <sub>9</sub> /H <sub>2</sub> Ti <sub>3</sub> O <sub>7</sub> | 10 mg catalyst, 5 mM HMF, acetonitrile (2 mL), Blue Led (25 mW cm <sup>-2</sup> ), <467 nm, O <sub>2</sub> | 1.5 h  | 97            | 84             | 562.7                                             | 2         |
| MAPbBr <sub>1</sub> Cl <sub>2</sub> QD                                                         | 4.5 mg catalyst, 5 mM HMF, ethyl acetate (2.5 mL), and 7.1 W blue light-emitting diodes, O <sub>2</sub>    | 3 h    | 100           | 75             | 1851.9                                            | 3         |
| Sv-ZnIn <sub>2</sub> S <sub>4</sub> /CeO <sub>2</sub>                                          | 30 mg catalyst, 8 mM HMF, acetonitrile (5 mL), 300 W Xenon lamp (λ > 420 nm), air, 25 °C                   | 80 min | 100           | 96.1           | 952.6                                             | 4         |
| SnIn <sub>4</sub> S <sub>8</sub> /WO <sub>3</sub>                                              | 20 mg catalyst, 10mM HMF, acetonitrile (10 mL), 300 W Xenon lamp, O <sub>2</sub>                           | 2 h    | 89            | 77.0           | 1715                                              | 5         |
| MAPbBr <sub>3</sub>                                                                            | 40 mg catalyst, 5 mM HMF, acetonitrile (10 mL), 450 nm blue LED light, 170 mWcm <sup>-2</sup>              | 10 h   | 100           | 90             | 112                                               | 6         |
| ((110)/(102))ZnIn <sub>2</sub> S <sub>4</sub>                                                  | 20 mg catalyst, 5 mM of HMF acetonitrile (10 mL), 300 W xenon lamp, O <sub>2</sub>                         | 1 h    | 91.1          | 99.4           | 1970                                              | 7         |
| SA-PDI/ZnIn <sub>2</sub> S <sub>4</sub>                                                        | 20 mg catalyst, 2 mM HMF, acetonitrile (10 mL), 300 W xenon lamp, O <sub>2</sub>                           | 1 h    | 97.3          | 95.7           | 1952                                              | 8         |
| M1P2                                                                                           | 100 mg catalyst, 6.3 mM HMF, acetonitrile (15 mL), 25 °C, air, 405 nm                                      | 40 min | 61            | 91             | 832                                               | 9         |
| Bi <sub>2</sub> WO <sub>6</sub>                                                                | 20 mg catalyst, 10 mM HMF, acetonitrile (5 mL), 300 W xenon light, (λ > 420 nm)                            | 10 h   | 58.3          | 99             | 145                                               | 10        |

**Table S2.** Comparison of photocatalytic HMF oxidation performances of Cs<sub>3</sub>Sb<sub>2</sub>Br<sub>9</sub>/CeO<sub>2</sub> with previously reported photocatalytic systems (high HMF concentration ).

| Photocatalyst                                                     | Reaction conditions                                                                                        | Time | HMF conv. (%) | DFF Selec. (%) | DFF Yield ( $\mu\text{mol g}^{-1} \text{h}^{-1}$ ) | Ref.      |
|-------------------------------------------------------------------|------------------------------------------------------------------------------------------------------------|------|---------------|----------------|----------------------------------------------------|-----------|
| Cs <sub>3</sub> Sb <sub>2</sub> Br <sub>9</sub> /CeO <sub>2</sub> | 5 mg catalyst, 20 mM HMF, ethyl acetate (5 mL), AM 1.5 G, 150 mW/cm <sup>2</sup> , O <sub>2</sub>          | 2 h  | 64            | 100            | 6226.1                                             | This work |
| P-Cd <sub>0.5</sub> Zn <sub>0.5</sub> S                           | 1 mg catalyst, 16 mM HMF, pure water (5 mL), White LED light sources (30 × 3 W)                            | 6 h  | 40            | 65             | 2600                                               | 11        |
| CC/ZnIn <sub>2</sub> S <sub>4</sub>                               | 20 mg catalyst, 20 mM HMF, acetonitrile (20 mL), xenon lamp 400~780 nm, air                                | 4 h  | 21.8          | 100            | 745                                                | 12        |
| ZIS/CuO-180                                                       | 25 mg catalyst, 20 mM HMF, H <sub>2</sub> O (10 mL), O <sub>2</sub> , 445 nm                               | 3 h  | 45            | 85.8           | 2666.7                                             | 13        |
| Cd <sub>0.7</sub> Zn <sub>0.3</sub> S/NiSe                        | 10 mg catalyst, 33 mM HMF, acetonitrile (3 mL), 300 W Xe lamp (780 nm $\geq$ $\lambda$ $\geq$ 400 nm), air | 11 h | /             | 98             | 1730                                               | 14        |

**Table S3.** PL decay parameters of the CeO<sub>2</sub> and Cs<sub>3</sub>Sb<sub>2</sub>Br<sub>9</sub>/CeO<sub>2</sub>-10.

| Sample                                                                | $\tau_1$ (ns) | A <sub>1</sub> % | $\tau_2$ (ns) | A <sub>2</sub> % | $\tau_3$ (ns) | A <sub>3</sub> % | $\tau_{\text{average}}$ (ns) |
|-----------------------------------------------------------------------|---------------|------------------|---------------|------------------|---------------|------------------|------------------------------|
| CeO <sub>2</sub>                                                      | 0.987         | 22.23            | 3.543         | 52.78            | 12.07         | 24.99            | 5.11                         |
| Cs <sub>3</sub> Sb <sub>2</sub> Br <sub>9</sub> /CeO <sub>2</sub> -10 | 0.974         | 66.88            | 2.031         | 29.66            | 15.85         | 3.46             | 1.80                         |

## References

1. J. Zhao, Y. Wang, H. Liu, R. Zhang, W. Jia, J. Zhang, Y. Sun and L. Peng, *ACS Catal.*, 2025, **15**, 3464-3474.
2. H. Awang, A. Hezam, S. Ding, T. Peppel and J. Strunk, *ACS Appl. Nano Mater.*, 2024, **7**, 25345-25359.
3. J. Han, H. Lee and H. S. Kim, *J. Mater. Chem. A*, 2024, **12**, 26920-26928.
4. Y. Wang, H. Liu, T. Lv, W. Jia, R. Zhang, L. Peng and J. Zhang, *Adv. Funct. Mater.*, 2025, **35**, 2415842.
5. H. Wang, L. Jing, H. Zhang, A. Varamesh, Y. Yan, Q. Gao, Z. Li and J. Hu, *J. Energy Chem.*, 2025, **105**, 373-384.
6. M. Zhang, Z. Li, X. Xin, J. Zhang, Y. Feng and H. Lv, *ACS Catal.*, 2020, **10**, 14793-14800.

7. H. Zhao, D. Trivedi, M. Roostaenia, X. Yong, J. Chen, P. Kumar, J. Liu, B.-L. Su, S. Larter, M. G. Kibria and J. Hu, *Green Chem.*, 2023, **25**, 692-699.
8. Y. Guo, B. Liu, J. Zhang, G. Wang, C. Pan, H. Zhao, C. Wang, F. Yu, Y. Dong and Y. Zhu, *Appl. Catal. B Environ.*, 2024, **340**, 123217.
9. S. Chu, J. Shao, H. Qu, X. Wang, R. Xiao and H. Zhang, *ChemSusChem*, 2023, **16**, e202300886.
10. A. Kumar and R. Srivastava, *ACS Appl. Nano Mater.*, 2021, **4**, 9080-9093.
11. H.-F. Ye, R. Shi, X. Yang, W.-F. Fu and Y. Chen, *Appl. Catal. B Environ.*, 2018, **233**, 70-79.
12. J. Qiu, L. Zhang, D. Dai, G. Xia and J. Yao, *ChemSusChem*, 2022, **15**, e202200399.
13. Y. Liu, W. Xue, J. Ye, R. Zhang, Y. Shao, A. P. Rangappa and J. Zhao, *Chem. Eng. J.*, 2025, **515**, 163620.
14. T. Shan, L. Luo, T. Chen, L. Deng, M. Li, X. Yang, L. Shen and M.-Q. Yang, *Green Chem.*, 2023, **25**, 2745-2756.
